# Supplementary material for: Natural history of NF1 c.2970_2972del p.(Met992del): confirmation of a low risk of complications in a longitudinal study
Source: Springer Nature journal article supplement (doi:10.1038/s41431-021-01015-4), 2021-12-13

**MEDICAL GENOMICS LABORATORY: NF1/SPRED1 PHENOTYPIC CHECKLIST FORM**

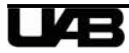

Patient ID: \_\_\_\_\_  
Referring Physician: \_\_\_\_\_ Date of Exam \_\_\_/\_\_\_/\_\_\_

**DEMOGRAPHIC INFORMATION**

Gender :  Male  Female Date of Birth: \_\_\_/\_\_\_/\_\_\_

Ethnicity: Mother:  White  Black  Native American  Hispanic  Asian  Other:  
Father:  White  Black  Native American  Hispanic  Asian  Other:

**DIAGNOSIS**

NIH criteria:  >6 CAL spots >5mm, postpubertal >15mm  Optic glioma  
 >2 neurofibromas or 1 plexiform NF  >2 Lisch nodules  
 Axillary or inguinal freckling  A distinct osseous lesion  
 First degree relative diagnosed with NF1 by above criteria  
Does patient fulfill NIH diagnostic criteria for NF1?  Yes  No

Clinical diagnosis:  NF1  Multiple CAL spots  Familial multiple CAL spots  
 Spinal NF  Isolated neurofibromas  Segmental NF1  
 NF Noonan  Single NF1 feature  Watson Syndrome  
 Legius syndrome  Unknown

Family history:  Sporadic (proband is a "founder")  Familial (proband is a "non-founder")  Unknown  
Consanguinity:  Yes  No  Unknown

**GENERAL INFORMATION**

Height: \_\_\_cm Head circumference: \_\_\_cm Weight: \_\_\_kg

**NF SIGNS AND SYMPTOMS**

1) CAL spots:  0  1-5  ≥6 to 100  >100  
General impression on the borders of the CAL-spots:  
 typical well-defined smooth borders diameter:  
 irregular margins, ragged borders diameter:  
for detail on size and location of the CAL-spots and other hyper/hypopigmentation areas: page 3.

2) Skin fold freckling:  None Left Right Comments (e.g. very faint,.....):  
Groin    
Axilla    
Submammary

3) Lisch nodules:  None  Left  Right  Unknown

4) Cutaneous neurofibromas (soft nodules that project above the skin): histopathologically confirmed: Y / N  
 0  2-6  6-99  100-500  >500

5) Intradermal neurofibromas (soft depression within the skin w/ pinkish overlying discoloration): histopathologically confirmed: Y / N  
 0  2-6  6-99  100-500  >500

6) Subdermal neurofibromas (firm nodules palpable underneath the skin): histopathologically confirmed: Y / N  
 0  2-6  6-99  100-500  >500

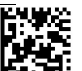

MEDICAL GENOMICS LABORATORY: *NF1/SPRED1* PHENOTYPIC CHECKLIST FORM

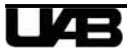

7) Plexiform neurofibromas: histopathologically confirmed: Y / N

- None
- visible from outside
- with hyperpigmentation
- without hyperpigmentation
- internal
- Head
- Neck
- Trunk
- L Arm
- L Hand
- L Leg
- L Foot
- Abdomen
- Pelvis
- Genital area
- R Arm
- R Hand
- R Leg
- R Foot

8) Spinal neurofibromas (neurofibromas arising from the spinal nerve root): histopathologically confirmed: Y / N

- Unknown
- Absent by MRI
- Present, asymptomatic
- Present, symptomatic

If present: please provide detail on **figure** page 4

unilateral or  bilateral;  
C \_\_\_\_\_ T \_\_\_\_\_, L \_\_\_\_\_, S \_\_\_\_\_ regions.

9) Optic glioma:

- Unknown
- Absent by MRI
- Present by MRI, **symptomatic**
  - Nerve (L and/or R)
  - Chiasm
- Present by MRI, **asymptomatic**
  - Nerve (L and/or R)
  - Chiasm

10) Other neoplasms:

- None
- Hypothalamic glioma
- Brainstem glioma
- Other glioma
- MPNST
- JMML
- Rhabdomyosarcoma
- Pheochromocytoma
- Colonic polyps
- Lipoma
- juvenile xanthogranuloma
- Breast cancer
- schwannoma
- Other, specify: \_\_\_\_\_

11) Skeletal Abnormalities:

- None
- Long bone dysplasia
- Pseudoarthrosis
- Sphenoid wing dysplasia
- Bone cysts
- scoliosis
- Dysplastic vertebrae
- pectus excavatum
- pectus carinatum
- Other: \_\_\_\_\_

12) Cardiovascular disease:

- Absent
- Unknown
- Present:
  - Hypertension
  - Pulmonic stenosis
  - Aortic stenosis
  - Renal artery stenosis
  - Moya moya
  - ASD
  - VSD
  - Other: \_\_\_\_\_

13) Development:

- Normal
- Exam not done
- Abnormal
  - ADD
  - Hyperactivity
  - Learning disability
  - speech delay
  - autism
  - pervasive developmental delay
- IQ: Full scale \_\_\_\_\_, Verbal \_\_\_\_\_, Performance \_\_\_\_\_.

14) Education:

- Too young for school
- At or above age level
- Below age level
- Unknown
- HS completion
- College graduate
- Higher degree

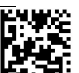

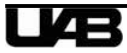

15) Noonan phenotype:

- Absent       Possible       Unknown  
 Present:       Short stature       Low set ears       Pulmonic Stenosis  
                           Hypertelorism       Webbed neck      peak jet velocity \_\_\_\_m/s  
                           Midface hypoplasia      peak gradient \_\_\_\_mmHg across pulmonic valve  
                           PTPN11 testing done? Result \_\_\_\_\_

16) Segmental NF phenotype:       Absent       Possible

location/size of pigmentary lesions and/or neurofibromas

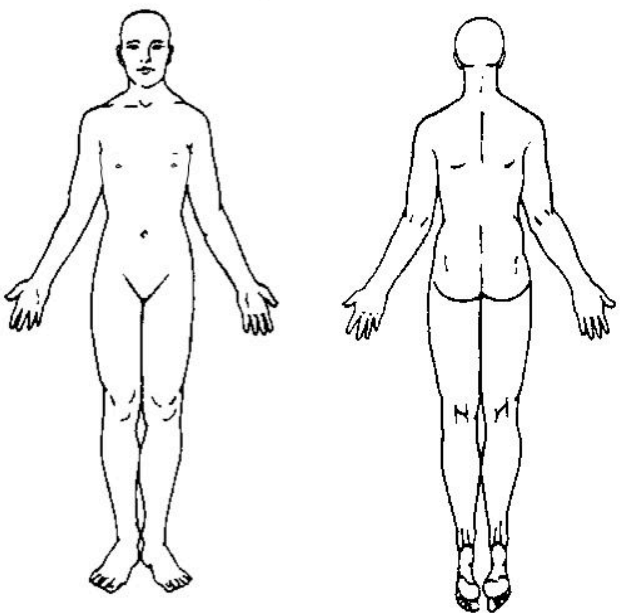

Indicate size and location of

- Neurofibromas 
- CAL-spots 
- Freckling 
- Hyperpigmented region 

17) location of spinal tumors (if present)

18) any other comments/remarks:

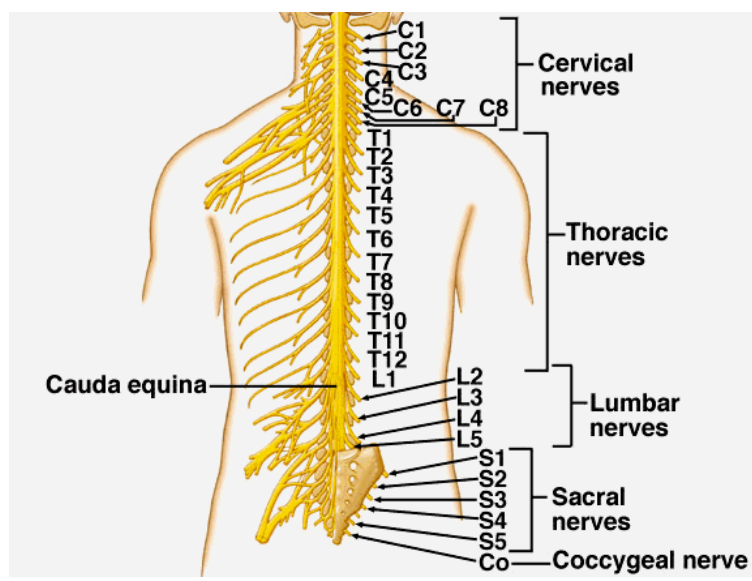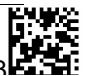

Supplement: MOESM1 [file 41431_2021_1015_MOESM1_ESM.pdf]
